# Supplementary material for: Development of a Rabies Virus-Vectored Vaccine against Borrelia burgdorferi Targeting BBI39
Source: Preprints.org preprint supplement (doi:10.20944/preprints202311.2009.v1), 2023-11-30
Supplement: Supplementary file 2 [file supplementary]

**Supplementary Figure 1:**

**SDS-PAGE protein gel of RABV-based constructs.**

1. Protein gel of sucrose purified virions showing all RABV proteins.

**Supplementary Figure 2**

**Sex differences in antibody titers from vaccinated female and male mice**

(a) anti-BBI39 total IgG EC50 titers for comparing male and female vaccinated mice. Statistics were calculated by one-way ANOVA with post hoc Tukey’s test of log-transformed data. p > (ns), p < 0.0332 (*), p < 0.0021 (**), p < 0.0002 (***), p < 0.0001 (****).

**Supplementary Figure 3**

***Borrelia burgdorferi* depletion in infected organs by culture in BSK and confirmation of infection by western blot.**

(a-c) Western blot analysis of infected mice by serum. Whole borrelial lysates ran on gel and transferred to nitrocellulose membrane. Probed with individual infected mouse serum from 2 separate experiments of female (a-b) and male (c) mice. (d) Number of infected mouse organs by culture in BSK-H medium numerated under dark field microscopy for presence of *Borrelia*.

**Supplementary Figure 4**

**Long-term vaccination and challenge organ culture and western blot analysis.**

(a-d) ELISA curves for anti-BBI39 and anti-RABV-G from individual mouse serum 8 months (224 days) post-initial immunization. Determination of EC50 titers in Figure 7. (e) Number of infected mouse organs by culture in BSK-H medium numerated under dark field microscopy for presence of *Borrelia*. (f) Western blot analysis of infected mice by serum. Whole borrelial lysates separated on an SDS-PAGE gel, transferred to nitrocellulose membrane, and probed with individual infected mouse serum.

**Supplementary Figure 5:**

**Raw data of western blots from Figure 2.**

Western blot from Figure 2b (a-b) and Figure 2d (c-d).
